# Supplementary material for: Comparison of electrophysiological properties of two types of pre-sympathetic neurons intermingled in the hypothalamic paraventricular nucleus
Source: PubMed Central journal article supplement — J Vet Sci. 2018 Jul 26;19(4):483–91. doi: 10.4142/jvs.2018.19.4.483 (PMC6070595; doi:10.4142/jvs.2018.19.4.483), 2018-07-26
Supplement: jvs-19-483-s001.pdf [file jvs-19-483-s001.pdf]

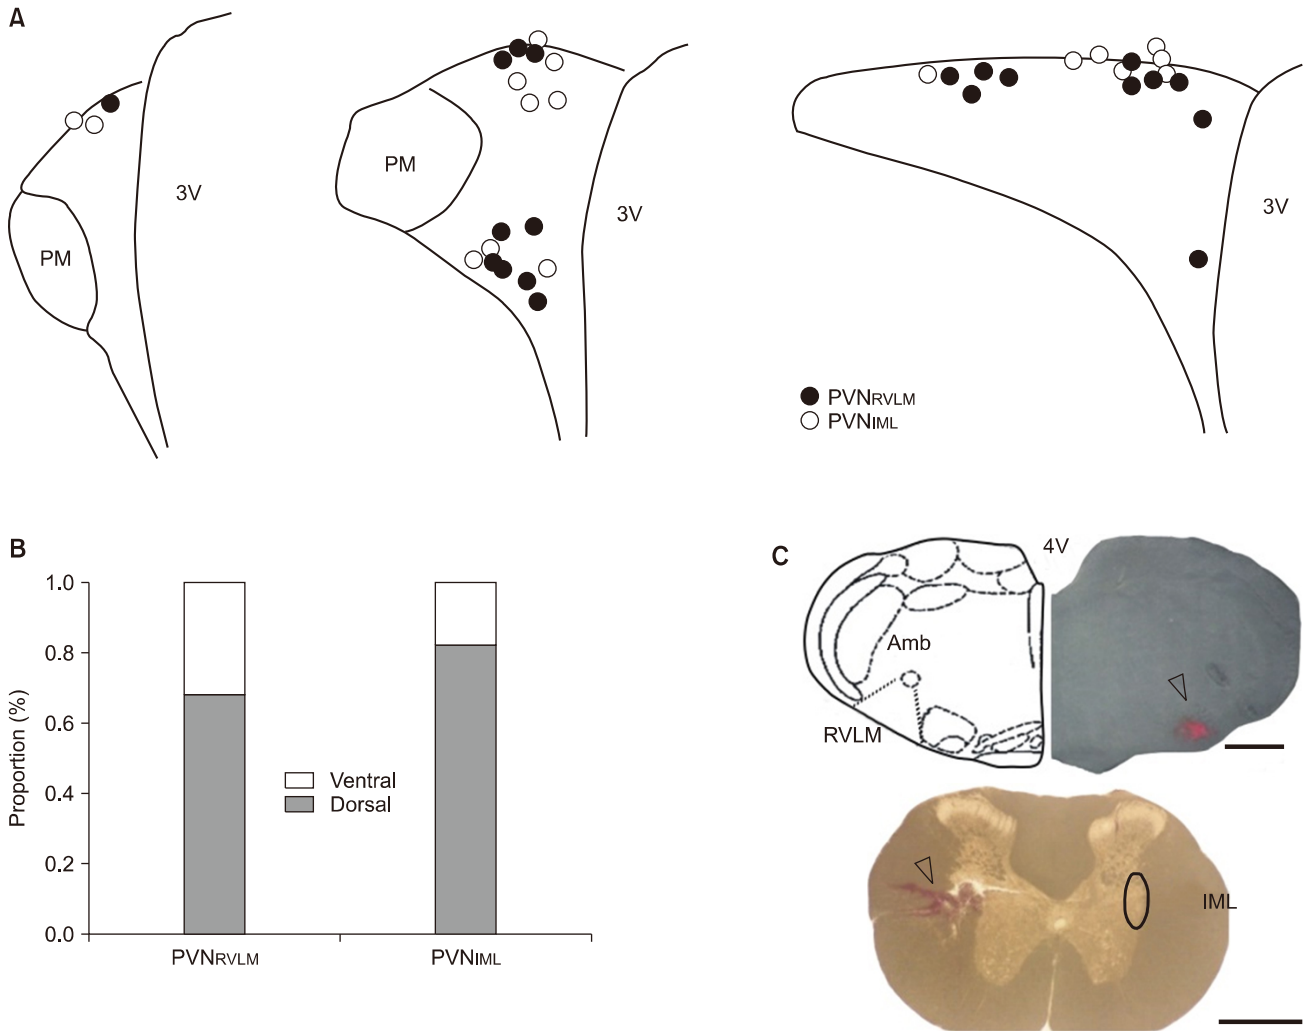

**Supplementary Fig. 1.** Distribution of the PVN neurons projecting to RVLM and IML. (A) Note that the neurons of both groups were found intermingled in the dorsal and ventral subdivisions of the PVN. A illustrates the location of neurons recorded from the slices of the anterior (left) to the posterior part of the PVN (right). (B) The bar graph summarizes the proportions of PVN<sub>RVLM</sub> and PVN<sub>IML</sub> neurons in the dorsal and ventral subdivisions. (C) Representative photographs showing sites of the FluoSphere injection, at a section (bregma -12 mm) including the RVLM (top) and the intermediolateral horn (IML) of spinal cord (T2; bottom). Scale bars = 1 mm. PVN, paraventricular nucleus; RVLM, rostral ventrolateral medulla; IML, intermediolateral horn of the spinal cord; 3V, the third ventricle; PM, posterior magnocellular; 4V, the fourth ventricle; Amb, the nucleus ambiguus.
